# Supplementary material for: Differences in the absolute muscle strength and power of children and adolescents with overweight or obesity: a systematic review
Source: Springer Nature journal article supplement (doi:10.1186/s12887-023-04290-w), 2023-09-19
Supplement: MOESM1 [file 26060106]

### Annex 1. Muscle strength tests

| Test              | Battery tests that include it                      | Explanation of the test                                                                                                                                   | Illustration                                                                          |
|-------------------|----------------------------------------------------|-----------------------------------------------------------------------------------------------------------------------------------------------------------|---------------------------------------------------------------------------------------|
| Handgrip strength | PFAAT, ALPHA-FIT, EUROFIT, IPFT, ASSO-FTB , CPAFLA | Hand strength tests require a hand dynamometer. Various protocols exist for its application in physical fitness assessment depending on the battery test. |    |
| Modified Push-ups | NYPFP, NZFT, NFTP-PRC                              | The result is reported according to the number of repetitions performed without modifying the initial position and is determined by upper limb strength.  |    |
| Bent arm hang     | NYPFP, PFAAT, CPAFLA.                              | It measures the amount of time the individual can maintain the lifting position of the body on the bar, thereby giving a measure of upper trunk strength. |    |
| Curl up           | NZFT, NYPFP, EUROFIT, NFTP-PCR, ASSO-FTB           | The number of abdominal repetitions performed by the patient is measured.                                                                                 |    |
| 90° Push-ups      | PCPF, NAPFA                                        | The number of repetitions of push-ups performed by the patient is measured, assessing if he/she can complete at least five repetitions                    |   |
| Squat 45°         | PCPF                                               | It measures the time the patient can hold the half-squat position, thereby estimating lower limb strength.                                                |  |

Continue Annex 1...

|                        |                   |                                                                                                                        |                                                                                     |
|------------------------|-------------------|------------------------------------------------------------------------------------------------------------------------|-------------------------------------------------------------------------------------|
| Modified bent arm hang | EUROFIT, NFTP-PRC | The time that the patient can maintain the position is evaluated, thereby determining the strength of the upper limbs. |  |
| Modified pull-ups      | FITNESSGRAM       | Test the repeatability of pull-ups by lifting your chin above the bar. The push up test has replaced it.               |  |

ALPHA-FIT: Assessing Levels of Physical Activity and Fitness; ASSO-FTB: Adolescents and Surveillance System for the Obesity prevention-Fitness Test Battery; CPAFLA: Canadian Physical Activity, Fitness, and Lifestyle Approach; EUROFIT: Eurofit battery tests; FITNESSGRAM: FITNESSGRAM youth fitness program; IPFT: International Physical Fitness Tests; NFTP-PRC: National Fitness Test Program in the Popular Republic China; NYFPF: National Youth Physical Program; NZFT: New Zealand Fitness Test; PCPF: President's Challenge: Physical Fitness; PFAAT: Physical Fitness and Athletic Ability Test.

Annex 2. Muscle power tests

| Test                 | Battery tests that include it                      | Explanation of the test                                                                                                                                       | Illustration                                                                          |
|----------------------|----------------------------------------------------|---------------------------------------------------------------------------------------------------------------------------------------------------------------|---------------------------------------------------------------------------------------|
| Countermovement jump | NYPFP, NZFT                                        | In this test, the individual is in an upright position with the hands on the waist, having to perform a vertical jump after a quick downward countermovement. | 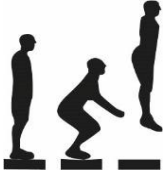   |
| Vertical jump test   | PFAAT                                              | It measures the maximum height reached by the patient, jumping from an upright position and keeping the feet' soles flat on the ground.                       |    |
| Standing long jump   | PFAAT                                              | It measures the muscular power of the lower limbs based on the distance achieved from the initial position.                                                   |    |
| Standing broad jump  | ALPHA-FIT, NFTP-PRC, NAPFA, CAPFLA, NYPFP, EUROFIT | It measures the muscular power of the lower limbs based on the distance achieved from the initial position.                                                   |    |
| Ball throw           | NZFT, PFAAT                                        | Power of the trunk and upper limbs, measuring the distance of the thrown object, taking into account its weight.                                              |  |
| Shot put back throw  | IPFT                                               | Measures the distance reached by the patient during the throw in a sitting position                                                                           |  |

ALPHA-FIT: Assessing Levels of Physical Activity and Fitness; CPAFLA: Canadian Physical Activity, Fitness, and Lifestyle Approach; EUROFIT: Eurofit battery tests; IPFT: International Physical Fitness Tests; NAPFA: Singapore National Physical Fitness Award/Assessment; NFTP-PRC: National Fitness Test Program in the Popular Republic China; NYPFP: National Youth Physical Program; NZFT: New Zealand Fitness Test; PFAAT: Physical Fitness and Athletic Ability Test.
